# Supplementary figures and images for: Creasing in evaporation-driven cavity collapse
Source: Royal Society of Chemistry journal article supplement (doi:10.1039/c7sm01258f), 2017-01-01

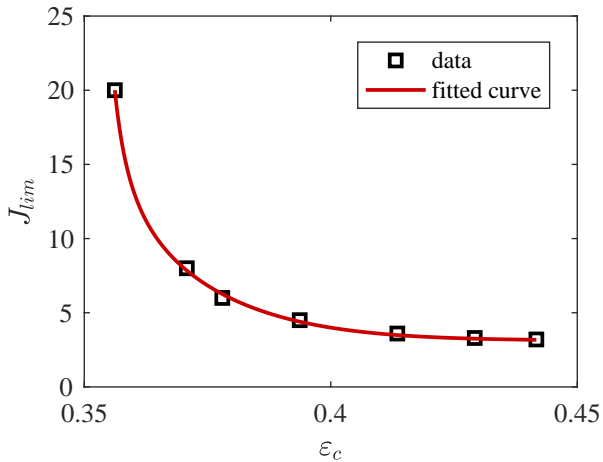

Supplement: c7sm01258f3.zip [file c7sm01258f3.zip]

10:1

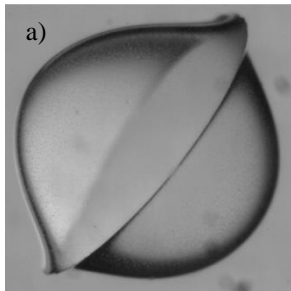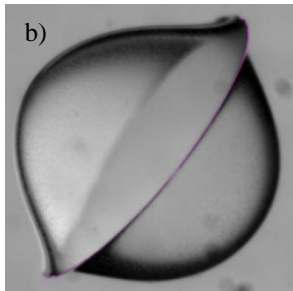

25:1

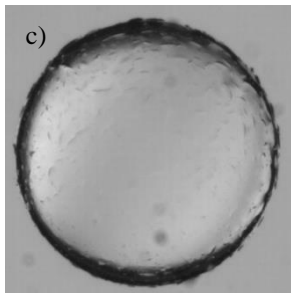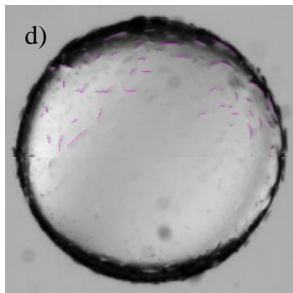

Supplement: c7sm01258f3.zip [file c7sm01258f3.zip]

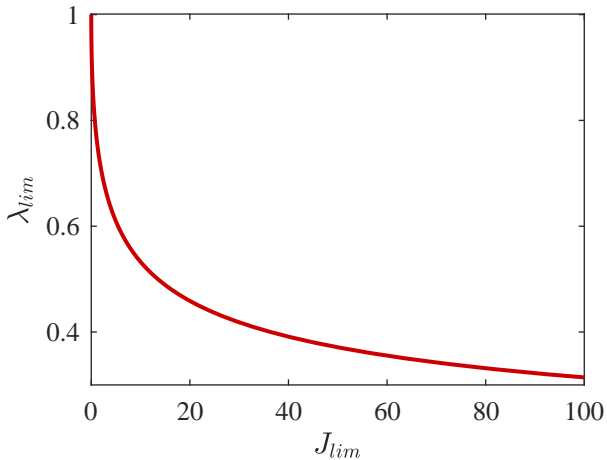

Supplement: c7sm01258f3.zip [file c7sm01258f3.zip]

a)

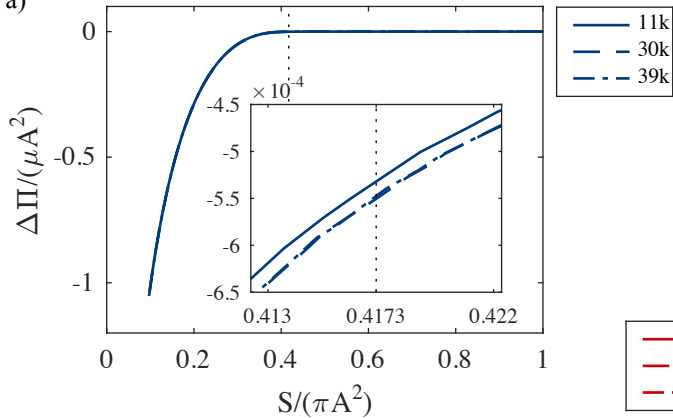

b)

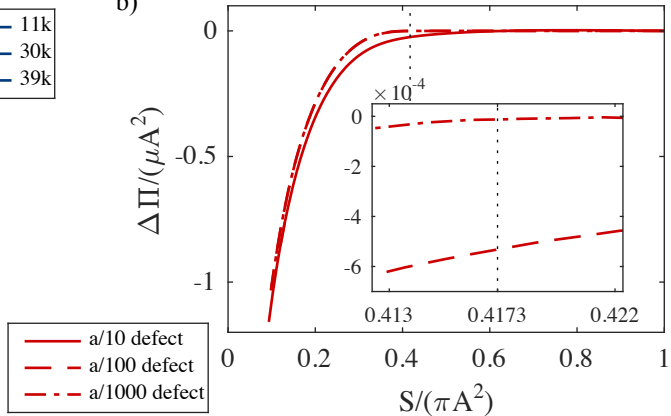

Supplement: c7sm01258f3.zip [file c7sm01258f3.zip]

a)

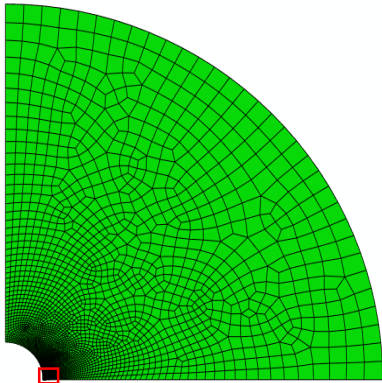

b)

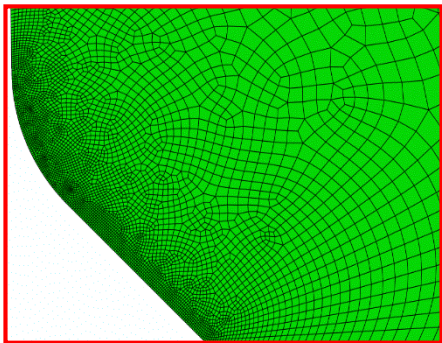

Supplement: c7sm01258f3.zip [file c7sm01258f3.zip]

a)

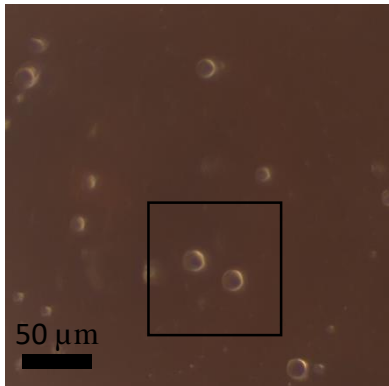

b)

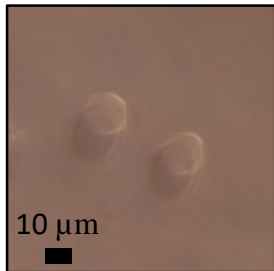

Supplement: c7sm01258f3.zip [file c7sm01258f3.zip]
